# Supplementary material for: Post COVID-19 symptoms are common, also among young adults in the general population
Source: Springer Nature journal article supplement (doi:10.1038/s41598-023-38315-2), 2023-07-12
Supplement: MOESM1 [file 41598_2023_38315_MOESM1_ESM.pdf]

## **Online supplement**

### **Post COVID-19 symptoms are common, also among young adults in the general population**

Ida Mogensen, Sandra Ekström\*, Jenny Hallberg, Antonios Georgelis, Erik Melén, Anna Bergström, Inger Kull

The first 2 authors contributed equally to this article, and both should be considered first author. The last 2 authors contributed equally to this article, and both should be considered senior author.

\*corresponding author

**BAMSE COVID-19 Study Group:**

Catarina Almqvist, Niklas Andersson, Natalia Ballardini, Anna Bergström, Sophia Björkander, Petter Brodin, Anna Castel, Sandra Ekström, Antonios Georgelis, Jenny Hallberg, Lennart Hammarström, Qiang Pan-Hammarström, Christer Janson, Maura Kere, Inger Kull, André Lauber, Alexandra Lövquist, Erik Melén, Jenny Mjösberg, Ida Mogensen, Lena Palmberg, Göran Pershagen, Chris Tibbitt, Niclas Roxhed, Jochen M. Schwenk

## **Definition of co-variables and chronic diseases**

### **Baseline questionnaire**

**Maternal smoking:** the mother smoked at least one cigarette per day at any point of time during pregnancy and/or in infancy

### **1–2-year follow-up questionnaire**

**Bronchitis first 2 years:** parental-reported doctor's diagnosis of bronchitis reported in the 1-year and/or 2-year questionnaire

**Pneumonia first 2 years:** parental-reported doctor's diagnosis of pneumonia reported in the 1-year and/or 2-year questionnaire

**Wheeze first 2 years:** at least one episode of wheeze (after 3 months of age) reported in the 1-year and/or 2-year questionnaire

### **24-year follow-up questionnaire**

**Smoking:** self-reported based on the question “do you smoke”, with the answer alternatives ‘No’, ‘No, but I have smoked before’ (referred to as ex-smoker), ‘Yes, sometimes’, ‘Yes, every day’. Smoking was also categorized as yes/no in some analyses due to low numbers.

**Snuff use:** self-reported based on the question “do you use snuff”, with the answer alternatives ‘No’, ‘No, but I have used snuff before’ (referred to as ex-user), ‘Yes, sometimes’, ‘Yes, every day’. Snuff use was also categorized as yes/no in some analyses due to low numbers.

**Asthma:** doctor's diagnosis of asthma (ever) together with symptoms of breathing difficulties or asthma medication occasionally or regularly in the last 12 months.

**Chronic bronchitis:** cough and mucus production in the morning during winter.

**Rhinitis:** symptoms from eyes or nose after exposure to furred animals or pollen (without having a flu) in the last 12 months

**Migraine, Depression and ADHD or ADD:** self-reported doctor's diagnosis (ever) of “Migraine”, “Depression”, “ADHD or ADD”, respectively.

**Consider themselves completely health:** answering “Completely healthy” to the question “How healthy would you say that you are?”

### **24-year follow-up examination**

**Overweight:** defined from measured weight and height as a body mass index  $\geq 25$  kg/m<sup>2</sup>.

**Sensitization to airborne allergens** were analyzed from the blood samples using the Phadiatop mix (cat, dog, horse, timothy, birch, mug wort, house dust mite and mold). IgE values  $\geq 0.35$  kU/L were considered positive.

**Lung function:** lung function testing was performed with spirometry (Vyaire Vyntus system, Vyair Medical, IL, USA, according to the ATS/ERS guidelines <sup>1</sup>; bronchodilation with four puffs of Salbutamol in spacer with new measurements 15 minutes later). Measured values were expressed as percent of predicted (pp) using the Global Lung Initiative reference

material<sup>2</sup>. Multiple breath nitrogen wash out test was performed at least twice with an Exhalyzer D (Ecomedics Technologies™, San Diego, CA) according to ERS guidelines<sup>3</sup>. As software, Spiroware 3.2.0 was used, and migrated to Spiroware 3.3.1 to correct for previously reported calculation errors<sup>4-6</sup>.

### **COVID-19 follow-up questionnaire**

**Education:** self-reported highest completed education at the time of the phase 3 questionnaire. Categorized as elementary school, high school/upper secondary school, university/College <3 years/folk high school and university  $\geq 3$  years.

**Occupation:** self-reported occupation at the time of the phase 3 questionnaire and categorized as studying, working, other (including the answer alternatives “parental leave or unpaid leave”, “unemployed”, “furloughed due to the current pandemic” or “other”)

**Living area:** based on the registered postal address at the time of questionnaire 3, categorized as Stockholm County or outside of Stockholm County

**Bedbound during COVID-19:** bedbound during the COVID-19 infection with the answer alternatives “no”, “yes, 1-6 days”, “yes,  $\geq 1$  week”

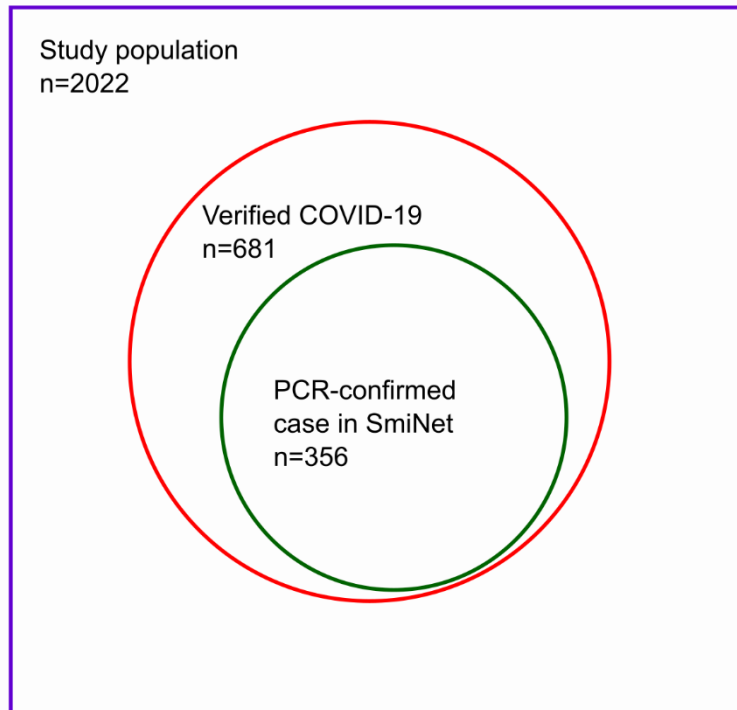

**Supplementary Figure 1.** Proportional Venn-diagram showing PCR-confirmed cases in the SmiNet register (a national register covering all positive PCR-tests for SARS-CoV-2 conducted in Sweden) and total number of confirmed cases of COVID-19 (PCR-verified in SmiNet and/or reported positive PCR and/or reported positive antigen test and/or reported IgG if unvaccinated during the clinical examination). Figure created in Stata and Inkscape.

**Supplementary Table S1.** Description of sociodemographic factors, disease severity and vaccination against COVID-19 among participants with and without confirmed COVID-19<sup>1</sup> (n=2022)

|                                                      | No confirmed<br>COVID-19 (n=1341) | Confirmed COVID-<br>19 (n=681) |                            |
|------------------------------------------------------|-----------------------------------|--------------------------------|----------------------------|
|                                                      | n (%)                             | n (%)                          | P-value <sup>2</sup>       |
| <b>Sex (n=2022)</b>                                  |                                   |                                | 0.76                       |
| - Female                                             | 788 (58.8)                        | 405 (59.5)                     |                            |
| - Male                                               | 553 (41.2)                        | 276 (40.5)                     |                            |
| <b>COVID-19 follow-up variables</b>                  | <b>n (%)</b>                      | <b>n (%)</b>                   | <b>P-value<sup>2</sup></b> |
| <b>Education (n=1948)</b>                            |                                   |                                | 0.68                       |
| - Elementary school                                  | 26 (2.0)                          | 11 (1.7)                       |                            |
| - High school/upper secondary school                 | 373 (28.7)                        | 184 (28.4)                     |                            |
| - University/College <3 years or folk<br>high school | 194 (14.9)                        | 110 (17.0)                     |                            |
| - University ≥ 3 years                               | 706 (54.4)                        | 344 (53.0)                     |                            |
| <b>Occupation (n=1953)</b>                           |                                   |                                | 0.79                       |
| - Studying                                           | 364 (27.9)                        | 183 (28.0)                     |                            |
| - Working                                            | 844 (64.8)                        | 426 (65.5)                     |                            |
| - Other                                              | 95 (7.3)                          | 42 (6.5)                       |                            |
| <b>Living area (n=2022)</b>                          |                                   |                                | <0.001                     |
| - Stockholm County                                   | <b>986 (73.5)</b>                 | <b>565 (83.0)</b>              |                            |
| - Outside of Stockholm County                        | <b>355 (26.5)</b>                 | <b>116 (17.0)</b>              |                            |

<sup>1</sup> Confirmed COVID-19 self-reported SARS-CoV-2 positive PCR-test, antigen test or IgG test before vaccination and/or positive PCR-test in the database SmiNet (a national register covering all positive PCR-tests for SARS-CoV-2 conducted in Sweden).

<sup>2</sup> P-value obtained by chi-2 test

**Supplementary Table S2.** Description lifestyle and chronic diseases before the pandemic among participants with and without confirmed COVID-19<sup>1</sup> (n=2022)

|                                                       | <b>No confirmed<br/>COVID-19<br/>(n=1341)</b> | <b>Confirmed<br/>COVID-19<br/>(n=681)</b> |                            |
|-------------------------------------------------------|-----------------------------------------------|-------------------------------------------|----------------------------|
|                                                       | <b>n (%)</b>                                  | <b>n (%)</b>                              | <b>P-value<sup>2</sup></b> |
| Early factors (1-2 year questionnaire)                |                                               |                                           |                            |
| Maternal smoking in pregnancy and/or infancy (n=2021) | 151 (11.3)                                    | 94 (13.8)                                 | 0.10                       |
| Pneumonia first 2 years (n=1948)                      | 100 (7.8)                                     | 49 (7.5)                                  | 0.81                       |
| Wheeze first 2 years (n=1948)                         | 315 (24.4)                                    | 180 (27.3)                                | 0.17                       |
| Bronchitis first 2 years (n=1943)                     | 180 (14.0)                                    | 104 (15.8)                                | 0.28                       |
| 24- year follow-up variables                          | <b>n (%)</b>                                  | <b>n (%)</b>                              | <b>P-value<sup>2</sup></b> |
| Smoking (n=2018)                                      |                                               |                                           | <0.001                     |
| - No                                                  | 960 (71.8)                                    | 430 (63.1)                                |                            |
| - Ex-smoker                                           | 151 (11.3)                                    | 97 (14.2)                                 |                            |
| - Yes, sometimes                                      | 134 (10.0)                                    | 113 (16.6)                                |                            |
| - Yes, everyday                                       | 92 (6.9)                                      | 41 (6.0)                                  |                            |
| Snuff use (n=2020)                                    |                                               |                                           | 0.20                       |
| - No                                                  | 1117 (83.4)                                   | 560 (82.2)                                |                            |
| - Ex-user                                             | 35 (2.6)                                      | 28 (4.1)                                  |                            |
| - Yes, sometimes                                      | 54 (4.0)                                      | 33 (4.9)                                  |                            |
| - Yes, everyday                                       | 133 (9.9)                                     | 60 (8.8)                                  |                            |
| Overweight (n=1675)                                   | 239 (21.7)                                    | 125 (21.7)                                | 1.00                       |
| Asthma (n=2017)                                       | 154 (11.5)                                    | 75 (11.1)                                 | 0.76                       |
| Chronic bronchitis (n=1972)                           | 71 (5.4)                                      | 36 (5.5)                                  | 0.98                       |
| Rhinitis (n=2001)                                     | 408 (30.8)                                    | 210 (31.1)                                | 0.88                       |
| Sensitization to airborne allergens (n=1656)          | 472 (43.5)                                    | 240 (42.1)                                | 0.60                       |
| Migraine doctors diagnosed (n=1970)                   | <b>74 (5.7)</b>                               | <b>53 (8.0)</b>                           | <b>0.049</b>               |
| Depression doctors diagnosed (n=1971)                 | <b>202 (15.5)</b>                             | <b>75 (11.3)</b>                          | <b>0.01</b>                |
| ADHD or ADD doctors diagnosed (n=1973)                | <b>74 (5.7)</b>                               | <b>22 (3.3)</b>                           | <b>0.02</b>                |
| Consider themselves completely healthy (n=1981)       | 823 (62.7)                                    | 432 (64.7)                                | 0.39                       |

<sup>1</sup> Confirmed COVID-19: self-reported SARS-CoV-2 positive PCR-test, antigen test or IgG test before vaccination and/or positive PCR-test in the database SmiNet (a national register covering all positive PCR-tests for SARS-CoV-2 conducted in Sweden).

<sup>2</sup> P-value obtained by chi-2 test

**Supplementary Table S3.** Description of disease severity (being bedbound during the COVID-19 disease) among participants with confirmed COVID-19 with and without post COVID-19, as well as for the groups with the three most common specific symptoms of post COVID-19 (altered smell and taste, dyspnea, and fatigue).

|                                         | <b>No post<br/>COVID-19<br/>(n=518)</b> | <b>Post<br/>COVID-19<br/>(n=112)</b> | <b>Altered<br/>smell/taste<br/>(n=76)</b> | <b>Dyspnea<br/>(n=34)</b> | <b>Fatigue<br/>(n=33)</b> |
|-----------------------------------------|-----------------------------------------|--------------------------------------|-------------------------------------------|---------------------------|---------------------------|
|                                         | n (%)                                   | n (%)                                | n (%)                                     | n (%)                     | n (%)                     |
| <b>Bedbound during<br/>disease (n=)</b> |                                         |                                      |                                           |                           |                           |
| - No                                    | 222 (42.9)                              | 35 (31.5)                            | 28 (36.8)                                 | 6 (17.7)                  | 4 (12.1)                  |
| - Yes, 1-6 days                         | 246 (47.5)                              | 59 (53.2)                            | 40 (52.6)                                 | 20 (58.8)                 | 16 (48.5)                 |
| - Yes, ≥ 1 week                         | 50 (9.7)                                | 17 (15.3)                            | 8 (10.5)                                  | 8 (23.5)                  | 13 (39.4)                 |
| P-value <sup>1</sup>                    |                                         | 0.044                                | 0.61                                      | 0.003                     | <0.001                    |

<sup>1</sup> All groups as compared to the groups with no post COVID-19 symptoms using chi-2 test.



**Supplementary Table S4.** Description lifestyle and chronic diseases before the pandemic (at the 24-year follow-up among participants with confirmed COVID-19 with or without post COVID-19

|                                                      | Confirmed COVID-19 <sup>1</sup><br>without post COVID<br>(n=569) | Confirmed COVID-19 <sup>1</sup><br>with post COVID-19<br>(n=112) | P-value <sup>2</sup>       |
|------------------------------------------------------|------------------------------------------------------------------|------------------------------------------------------------------|----------------------------|
| <b>Early factors (1–2-year follow-up)</b>            | <b>n (%)</b>                                                     | <b>n (%)</b>                                                     |                            |
| Maternal smoking in pregnancy and/or infancy (n=681) | 76 (13.4)                                                        | 18 (16.1)                                                        | 0.45                       |
| Pneumonia first 2 years (n=658)                      | 37 (6.7)                                                         | 12 (11.2)                                                        | 0.11                       |
| Wheeze first 2 years (n=659)                         | 154 (27.9)                                                       | 26 (24.5)                                                        | 0.48                       |
| Bronchitis first 2 years (n=657)                     | 90 (16.3)                                                        | 14 (13.2)                                                        | 0.42                       |
| <b>24- year-follow-up variables</b>                  | <b>n (%)</b>                                                     | <b>n (%)</b>                                                     | <b>P-value<sup>2</sup></b> |
| Smoking (n=681)                                      | 128 (22.5)                                                       | 26 (23.3)                                                        | 0.87                       |
| Snuff use (n=681)                                    | 79 (13.9)                                                        | 14 (12.5)                                                        | 0.70                       |
| Overweight (n=575)                                   | 104 (21.6)                                                       | 21 (22.6)                                                        | 0.83                       |
| Asthma (n=678)                                       | 59 (10.4)                                                        | 16 (14.4)                                                        | 0.22                       |
| Chronic bronchitis (n=661)                           | 29 (5.2)                                                         | 7 (6.5)                                                          | 0.60                       |
| Rhinitis (n=675)                                     | 174 (30.8)                                                       | 36 (32.7)                                                        | 0.69                       |
| Sensitization to airborne allergens (n=570)          | 196 (41.1)                                                       | 44 (47.3)                                                        | 0.27                       |
| Migraine doctors diagnosed (n=665)                   | 40 (7.2)                                                         | 13 (11.7)                                                        | 0.11                       |
| Depression doctors diagnosed (n=666)                 | 62 (11.2)                                                        | 13 (11.7)                                                        | 0.87                       |
| ADHD or ADD doctors diagnosed (n=666)                | 16 (2.9)                                                         | 6 (5.4)                                                          | 0.18                       |
| Consider themselves completely healthy (n=668)       | 370 (66.2)                                                       | 62 (56.9)                                                        | 0.06                       |

<sup>1</sup> Confirmed COVID-19: confirmed case in SmiNet (PCR-verified) and/or reported positive PCR and/or reported positive antigen test and/or reported IgG if unvaccinated during the clinical examination (all from the questionnaire in phase 3)

<sup>2</sup> P-value obtained by chi-2 test or Fischer's exact test depending on size of the groups

**Supplementary Table S5.** Description of lung function before the pandemic (at the 24-year follow-up) among participants with confirmed COVID-19 with or without post COVID-19

|                         | <b>No post COVID-19</b><br><b>Pre BD: n=440</b><br><b>Post BD: n=420</b> | <b>Post COVID-19</b><br><b>Pre BD: n=84</b><br><b>Post BD: n=79</b> | <b>P-value<sup>1</sup></b> |
|-------------------------|--------------------------------------------------------------------------|---------------------------------------------------------------------|----------------------------|
|                         | <b>mean (SD)</b>                                                         | <b>mean (SD)</b>                                                    |                            |
| <b>FEV1pp pre BD</b>    | 97.0 (9.5)                                                               | 97.1 (9.9)                                                          | 0.93                       |
| <b>FEV1pp post BD</b>   | 100.4 (9.3)                                                              | 101.0 (9.8)                                                         | 0.59                       |
| <b>FVCpp pre BD</b>     | 100.1 (9.8)                                                              | 100.3 (9.8)                                                         | 0.86                       |
| <b>FVCpp post BD</b>    | 99.6 (9.9)                                                               | 100.5 (9.9)                                                         | 0.44                       |
| <b>FEV1/FVC pre BD</b>  | 0.83 (0.058)                                                             | 0.83 (0.064)                                                        | 0.94                       |
| <b>FEV1/FVC post BD</b> | 0.86 (0.049)                                                             | 0.86 (0.056)                                                        | 0.72                       |
|                         | n=246                                                                    | N=51                                                                |                            |
| <b>LCI</b>              | 6.09 (0.41)                                                              | 6.03 (0.37)                                                         | 0.31                       |

<sup>1</sup> P-value obtained by the t-test

BD: Bronchodilation; pp: percent of predicted; FEV1: forced exhaled volume the first second; FVC: forced vital capacity; LCI: lung clearance index

**Supplementary Table S6.** Description of lung function before the pandemic (at the 24-year follow-up) in participants without post COVID-19 compared with participants with post COVID-19 symptom of dyspnea

|                         | No post COVID-19                | No post COVID-19<br>dyspnea   | P-value <sup>1</sup> |
|-------------------------|---------------------------------|-------------------------------|----------------------|
|                         | Pre BD: n=440<br>Post BD: n=420 | Pre BD: n=28<br>Post BD: n=25 |                      |
|                         | mean (SD)                       | mean (SD)                     |                      |
| <b>FEV1pp pre BD</b>    | 97.0 (9.5)                      | 97.3 (9.0)                    | 0.86                 |
| <b>FEV1pp post BD</b>   | 100.4 (9.3)                     | 100.9 (10.2)                  | 0.79                 |
| <b>FVCpp pre BD</b>     | 100.1 (9.8)                     | 101.5 (10.3)                  | 0.45                 |
| <b>FVCpp post BD</b>    | 99.6 (9.9)                      | 102.3 (10.6)                  | 0.19                 |
| <b>FEV1/FVC pre BD</b>  | 0.83 (0.058)                    | 0.82 (0.068)                  | 0.51                 |
| <b>FEV1/FVC post BD</b> | 0.86 (0.049)                    | 0.85 (0.059)                  | 0.088                |
|                         | n=246                           | n=23                          |                      |
| <b>LCI</b>              | 6.09 (0.41)                     | 6.15 (0.40)                   | 0.50                 |

Pre: n=440+28 Post: n=420+25

<sup>1</sup> P-value obtained by the t-test

BD: Bronchodilation; pp: percent of predicted; FEV1: forced exhaled volume the first second; FVC: forced vital capacity; LCI: lung clearance index

**Supplementary Table S7.** Association between sociodemographic factors during the pandemic as well as chronic diseases before the pandemic and post COVID-19 defined as symptoms lasting for at least 3 months after COVID-19 in combination with confirmed COVID-19, analyzed by a mutually adjusted multivariable logistic regression analysis (n=510)

|                                                           | <b>Post COVID-19</b> |               |
|-----------------------------------------------------------|----------------------|---------------|
|                                                           | <b>OR</b>            | <b>95% CI</b> |
| <b>Sex</b>                                                |                      |               |
| Females                                                   | Referent             | -             |
| Males                                                     | 0.93                 | 0.56-1.56     |
| <b>Living area</b>                                        |                      |               |
| Outside of Stockholm County                               | Referent             | -             |
| Stockholm County                                          | 1.04                 | 0.53-2.05     |
| <b>Education</b>                                          |                      |               |
| Elementary school, high school, or upper secondary school | Referent             | -             |
| University/College                                        | 0.78                 | 0.47-1.29     |
| <b>Occupation</b>                                         |                      |               |
| Student                                                   | Referent             | -             |
| Worker                                                    | 0.67                 | 0.39-1.14     |
| Other                                                     | 0.87                 | 0.32-2.38     |
| <b>Bedbound during COVID-19</b>                           |                      |               |
| No                                                        | Referent             | -             |
| Yes, 1-6 days                                             | 1.27                 | 0.74-2.16     |
| Yes, ≥ 1 week                                             | 1.57                 | 0.72-3.45     |
| <b>BMI status at 24 years</b>                             |                      |               |
| Normal weight                                             | Referent             | -             |
| Overweight                                                | 0.80                 | 0.43-1.49     |
| <b>Smoking at 24 years</b>                                |                      |               |
| No                                                        | Referent             | -             |
| Yes                                                       | 0.82                 | 0.45-1.50     |
| <b>Asthma at 24 years</b>                                 |                      |               |
| No                                                        | Referent             | -             |
| Yes                                                       | 1.09                 | 0.52-2.31     |
| <b>Consider themselves completely healthy</b>             |                      |               |
| No                                                        | Referent             | -             |
| Yes                                                       | 0.62                 | 0.38-1.01     |

## References:

- 1 Graham, B. L. *et al.* Standardization of Spirometry 2019 Update. An Official American Thoracic Society and European Respiratory Society Technical Statement. *Am J Respir Crit Care Med* **200**, e70-e88, doi:10.1164/rccm.201908-1590ST (2019).
- 2 Quanjer, P. H. *et al.* Multi-ethnic reference values for spirometry for the 3-95-yr age range: the global lung function 2012 equations. *The European respiratory journal* **40**, 1324-1343, doi:10.1183/09031936.00080312 (2012).
- 3 Robinson, P. D. *et al.* Consensus statement for inert gas washout measurement using multiple- and single- breath tests. *The European respiratory journal* **41**, 507-522, doi:10.1183/09031936.00069712 (2013).
- 4 Wyler, F., Oestreich, M. A., Frauchiger, B. S., Ramsey, K. A. & Latzin, P. Correction of sensor crosstalk error in Exhalyzer D multiple-breath washout device significantly impacts outcomes in children with cystic fibrosis. *Journal of applied physiology (Bethesda, Md. : 1985)* **131**, 1148-1156, doi:10.1152/jappphysiol.00338.2021 (2021).
- 5 R, M. S., Gustafsson, P. M., Lindblad, A., Robinson, P. D. & K, G. N. Improved agreement between N(2) and SF(6) multiple-breath washout in healthy infants and toddlers with improved EXHALYZER D sensor performance. *Journal of applied physiology (Bethesda, Md. : 1985)* **131**, 107-118, doi:10.1152/jappphysiol.00129.2021 (2021).
- 6 Frauchiger, B. S. *et al.* Do clinimetric properties of LCI change after correction of signal processing? *Pediatric pulmonology*, doi:10.1002/ppul.25865 (2022).
